# Supplementary material
Source: publisher figshare collection journal article supplement (https://acs.figshare.com/ndownloader/files/22047384)
Supplement: Supplementary file 1 [file 22047384]

## Supporting Information

### Reconstitution of 3-acetyl chlorophyll *a* into light-harvesting complex 2 from the purple photosynthetic bacterium

### *Phaeospirillum molischianum*

Yoshitaka Saga,<sup>\*,†</sup> Madoka Yamashita,<sup>†</sup> Michie Imanishi,<sup>‡</sup> Yukihiro Kimura,<sup>‡</sup> Yuto Masaoka,<sup>§</sup>

Tsubasa Hidaka,<sup>§</sup> Yutaka Nagasawa,<sup>§</sup>

<sup>†</sup> Department of Chemistry, Faculty of Science and Engineering, Kindai University, Higashi-Osaka, Osaka 577-8502, Japan

<sup>‡</sup> Graduate School of Agricultural Science, Kobe University, Kobe 657-8501, Japan

<sup>§</sup> Graduate School of Life Sciences, Ritsumeikan University, Kusatsu, Shiga 525-8577, Japan

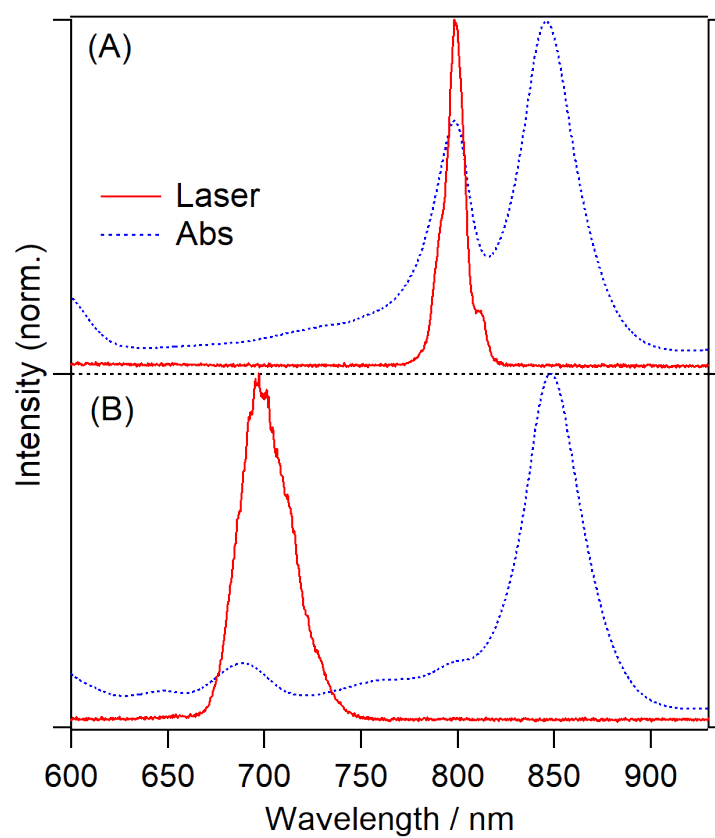

**Figure S1.** Overlap between the pump pulses (red solid curves) and the absorption spectra (blue broken curves) of native LH2 (A) and AcChl-reconstituted LH2 (B).

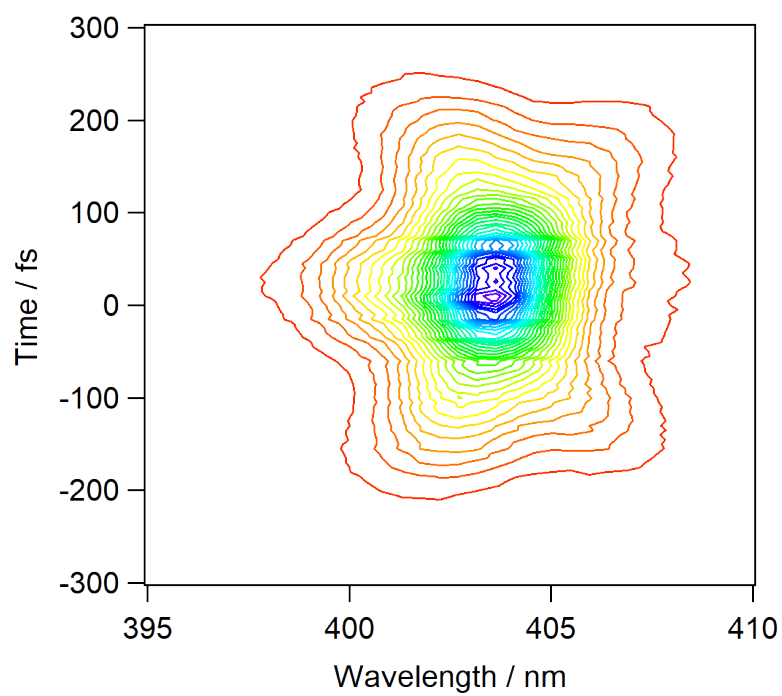

**Figure S2.** SHG-FROG signal for the pump pulse at 800 nm (fwhm:  $130 \pm 3.3$  fs).

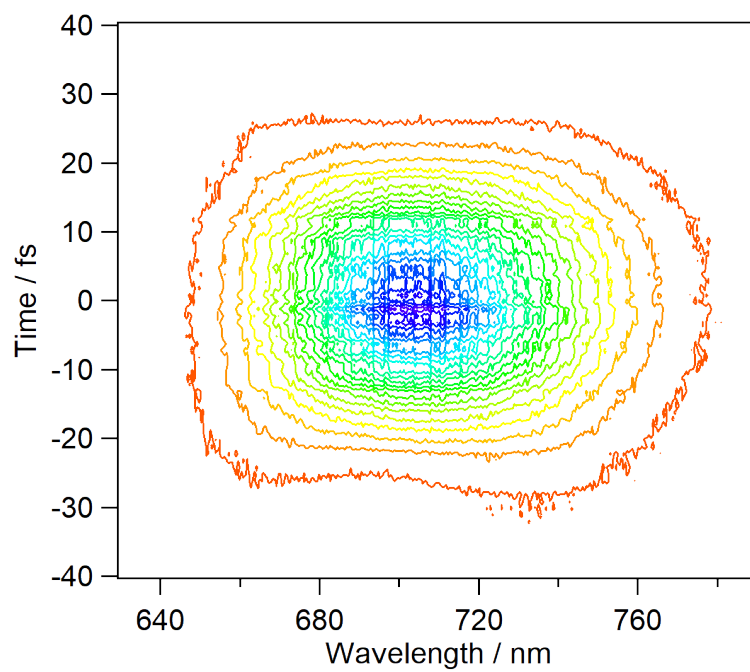

**Figure S3.** SD-FROG signal for the pump pulse at 695 nm (fwhm:  $18.5 \pm 0.38$  fs).

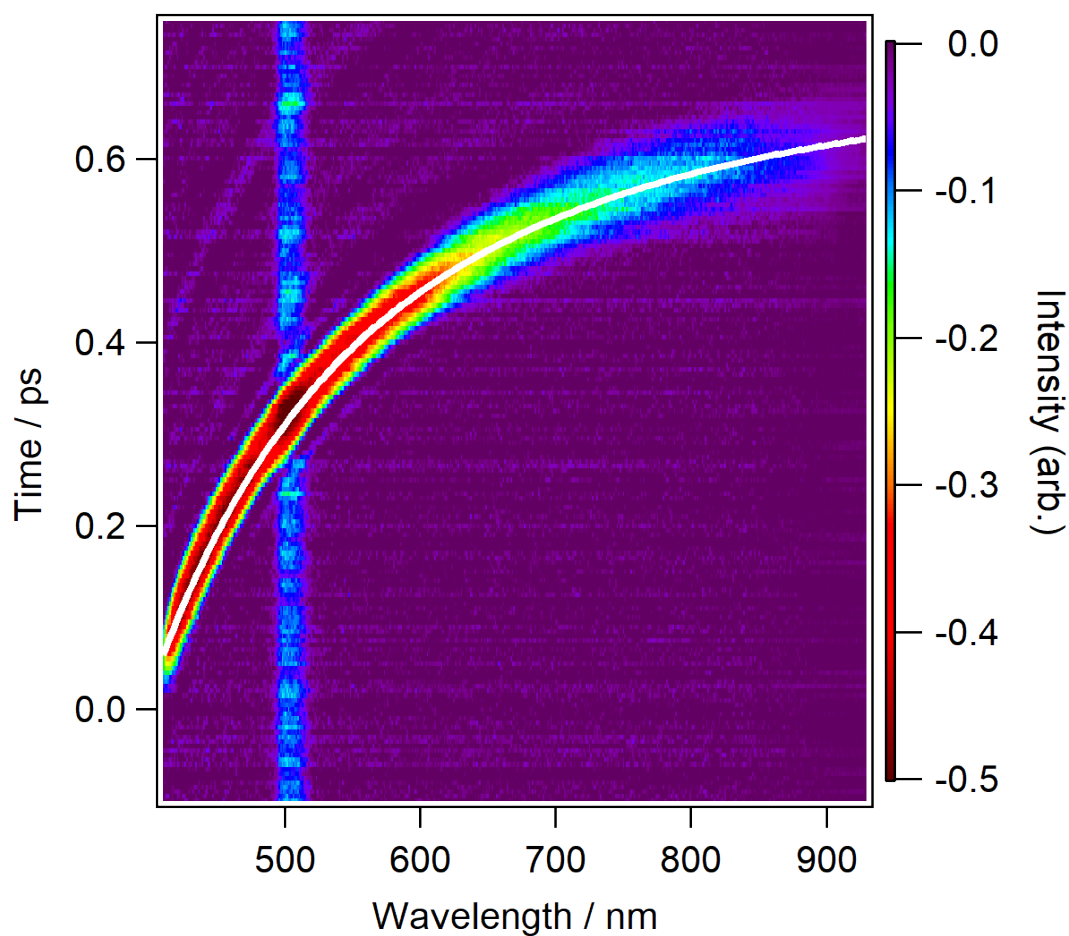

**Figure S4.** The HD-OKE signal between the pump and the probe pulses generated from neat carbon tetrachloride inside the sample cell. Wavelength dependence of the maximum of the electronic response was utilized to compensate the group velocity dispersion of the femtosecond time-resolved transient absorption spectra.

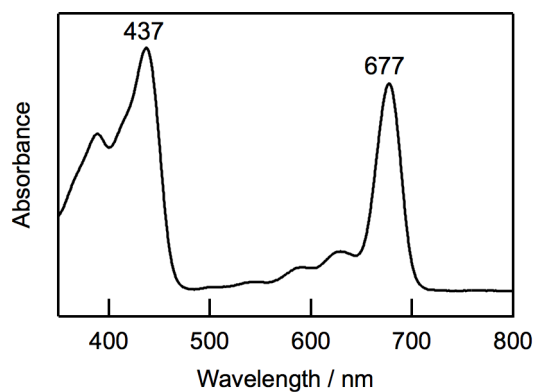

**Figure S5.** Electronic absorption spectrum of AcChl *a* in acetone.

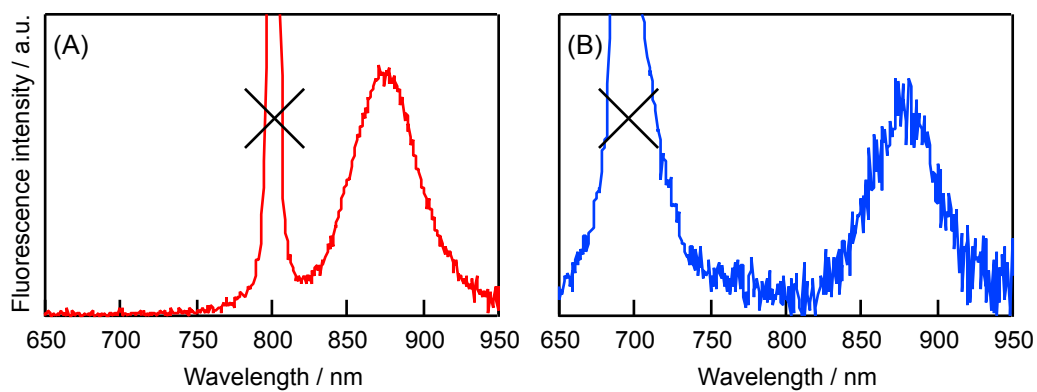

**Figure S6.** Fluorescence emission spectra of BChl-reconstituted LH2 (A) and AcChl-reconstituted LH2 (B) by excitation at 798 and 692 nm, respectively, in 20 mM Tris buffer containing 0.05% *n*-dodecyl- $\beta$ -D-maltoside (pH=8.0). The signals denoted by  $\times$  are due to excitation light.
